# Supplementary material
Source: MDPI journal article supplement (https://www.mdpi.com/2673-527X/1/3/19)
Supplement: s1 [file s1]

# Differential effects of Oleuropein and Hydroxytyrosol on Aggregation and Stability of CFTR NBD1-ΔF508 Domain

Christopher S. Robinson <sup>1,†</sup>, Jennifer A. Wyderko <sup>1,3,†</sup>, Yeng Vang <sup>1,4</sup>, Galen Martin <sup>2,5</sup>, Robert T. Youker <sup>1,\*</sup>

<sup>1</sup> Department of Biology, Western Carolina University, Cullowhee, NC, USA

<sup>2</sup> Warren Wilson College, Swannanoa, NC, USA

<sup>3</sup> Office of Sponsored Programs, Virginia Tech, Blacksburg, VA, USA

<sup>4</sup> Exela Pharma Sciences, Lenoir, NC, USA

<sup>5</sup> Department of Ecology and Evolutionary Biology, University of California Irvine, Irvine, CA, USA

\* Correspondence: rtyouker@wcu.edu

† These authors contributed equally to this work

## Supplementary Materials

**Table S1.** Ligand-mNBD1-ΔF508 docking scores of BIA and Oleuropein full fitness and ΔG values for most stable docked molecules shown in Figure 3.

| Name           | Full Fitness kcal/mol | ΔG kcal/mol |
|----------------|-----------------------|-------------|
| BIA            | -1630.1               | -6.37       |
| Oleuropein     | -1585.0               | -8.36       |
| Hydroxytyrosol | -1626.3               | -6.25       |

**Table S2.** ANOVA analysis of DSF experiments.

| ANOVA Analysis                              |          |                |               |
|---------------------------------------------|----------|----------------|---------------|
| <i>mNBD1-ΔF508 vs Name</i>                  | <i>F</i> | <i>P-value</i> | <i>F crit</i> |
| mNBD1-ΔF508 + 1mM ATP                       | 43.40    | 0.00275        | 7.709         |
| mNBD1-ΔF508 + 5mM ATP                       | 302.88   | 0.00006        | 7.709         |
| mNBD1-ΔF508 + 1mM BIA                       | 10.86    | 0.03006        | 7.709         |
| mNBD1-ΔF508 + 1.5mM ATP + 1mM BIA           | 194.59   | 0.00015        | 7.709         |
| mNBD1-ΔF508 + 100μM Oleuropein              | 0.29     | 0.61671        | 7.709         |
| mNBD1-ΔF508 + 100μM Hydroxy-Tyrosol         | 0.07     | 0.79986        | 7.709         |
| mNBD1-ΔF508 + 500μM Hydroxy-Tyrosol         | 0.34     | 0.59343        | 7.709         |
| mNBD1-ΔF508 + 1mM Hydroxy-Tyrosol           | 0.85     | 0.40977        | 7.709         |
| mNBD1-ΔF508 + 1mM Hydroxy-Tyrosol + 1mM BIA | 13.72    | 0.02076        | 7.709         |

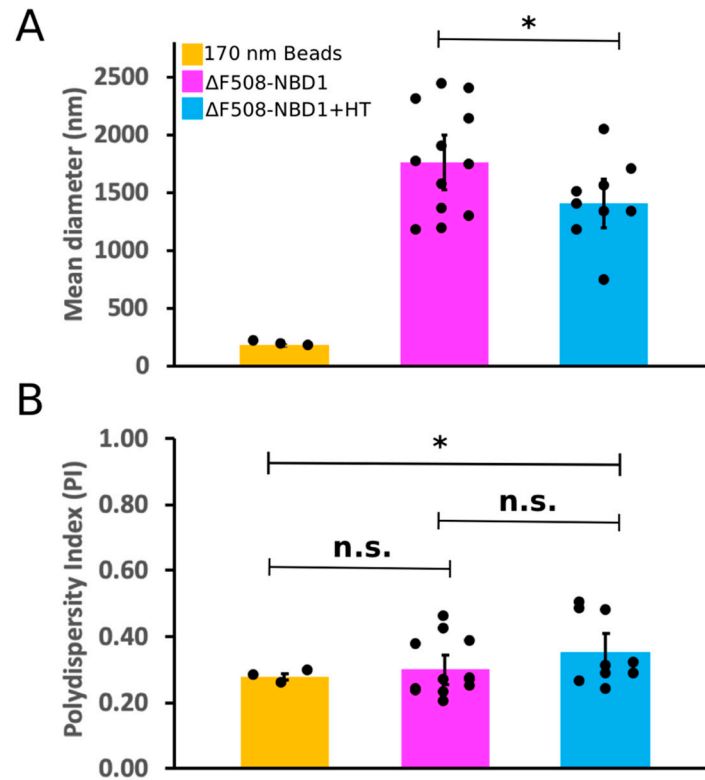

**Figure S1. NBD1-ΔF508 aggregates incubated with Hydroxytyrosol are smaller in diameter and mostly monodispersed.** **A)** Mean diameter of NBD1-ΔF508 aggregates measured by dynamic light scattering in the absence (n=4, 12 replicates) or presence of 100 μM Hydroxytyrosol (n=3, 9 replicates), \**p*-value = 0.032. Aggregate diameter in absence and presence of Hydroxytyrosol was significantly larger compared to 170 nm beads (3 replicates), *p*-value = 7.17E-08 and *p*-value = 3.21E-06, respectively. **B)** mean polydispersity measurement for control (n=4, 12 replicates) and Hydroxytyrosol incubated (n=3, 9 replicates) NBD1-ΔF508 aggregates compared to 170 nm beads, \**p*-value = 0.0387 and n.s. = not significant (*p*-value > 0.05). Data plotted as mean ± SEM. Significant differences were analyzed by unpaired Student's *t*-test.

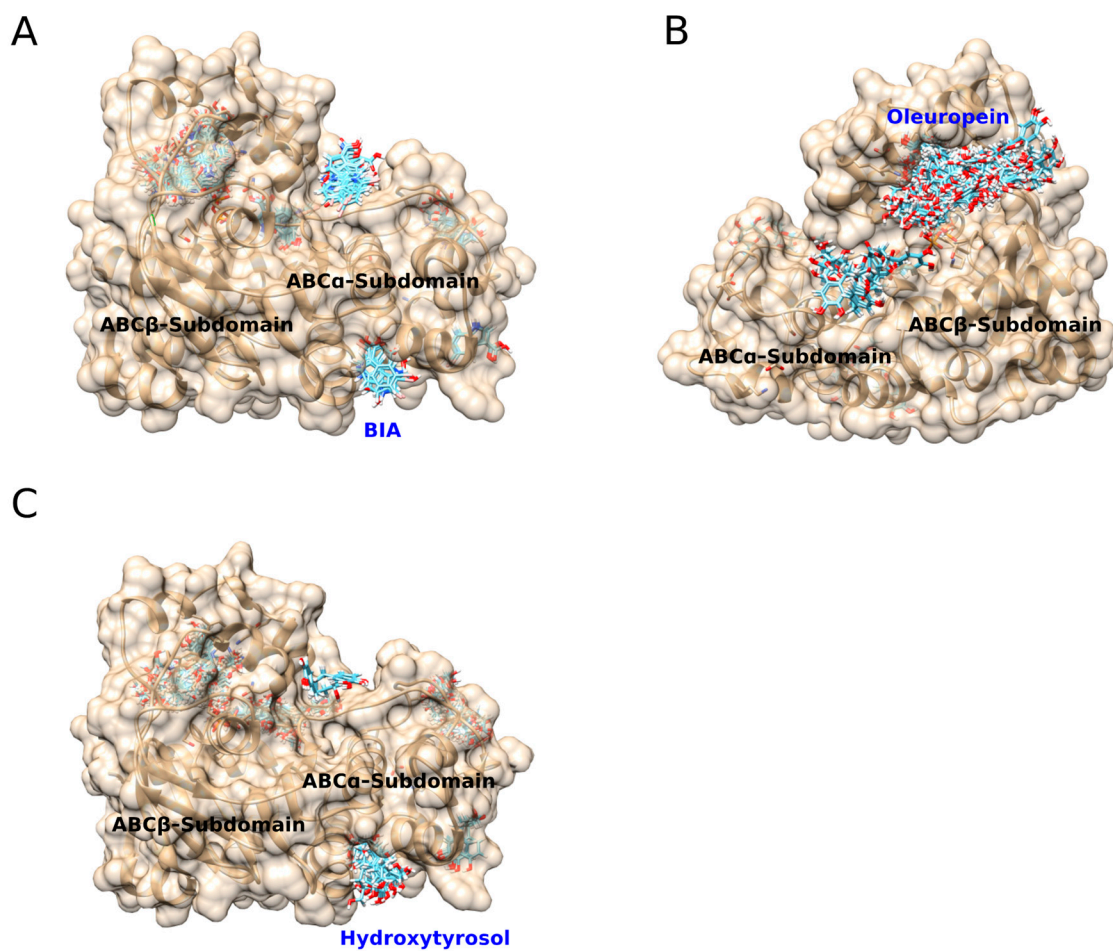

**Figure S2.** Full SwissDock predicted binding modes for BIA, Oleuropein, and Hydroxytyrosol to mNBD1- $\Delta$ F508. Note the majority of predicted binding modes for BIA and Hydroxytyrosol overlap. The majority of Oleuropein binding modes are in the ATP binding cleft.

**A**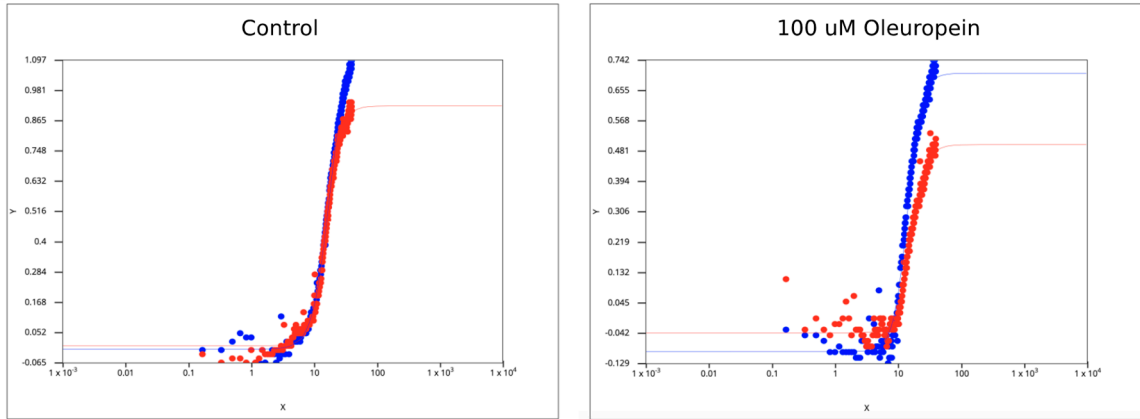**B**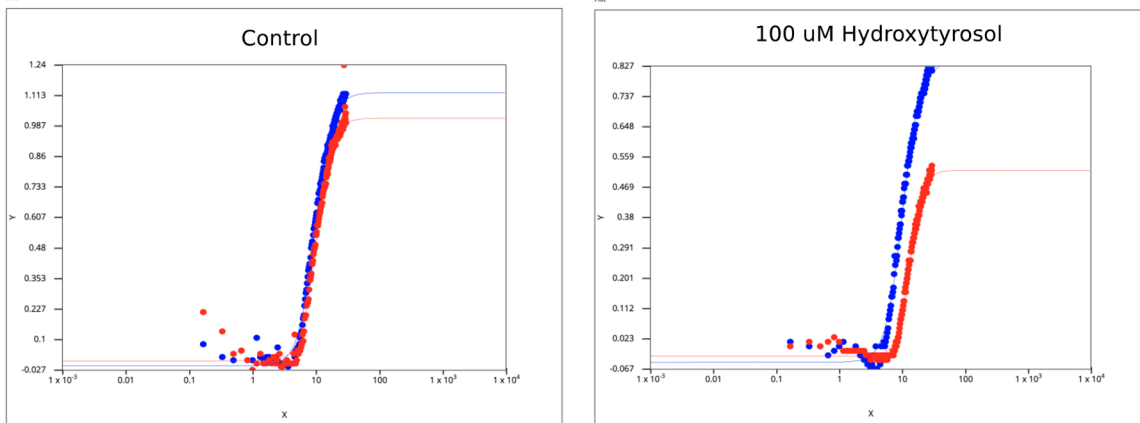

**Figure S3.** Curve fitting of mNBD1-ΔF508 aggregation data from Figure 1C & D. **A)** Representative results for control (left panel) and 100  $\mu$ M Oleuropein (right panel) data fitted with logistics equation. **B)** Representative results for control (left panel) and 100  $\mu$ M Hydroxytyrosol (right panel) data fitted with four parameter logistics equation.
